# Supplementary material
Source: Springer Nature journal article supplement (https://www.springermedizin.de/resource/supplementary/12936_2012_2558_MOESM4_ESM.pdf/9543238)

**Khartoum, Sudan**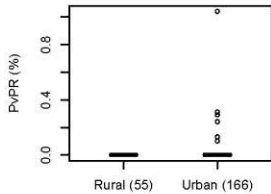**Medan, Indonesia**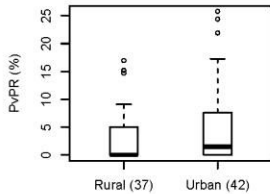**Alamata, Ethiopia\*\***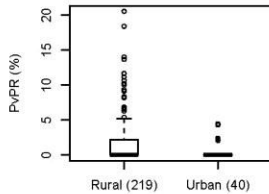**Sorong, Indonesia**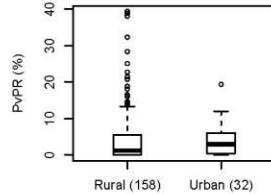**Lusaka, Zambia**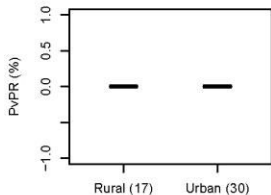**Jakarta, Indonesia\*\***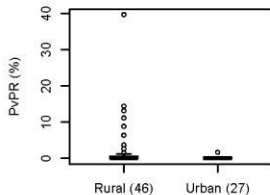**Batam, Indonesia\*\***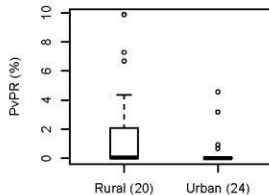**Rourkela, India\*\*\***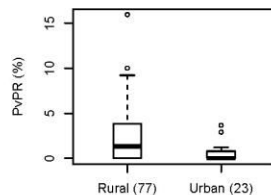**Mataram, Indonesia**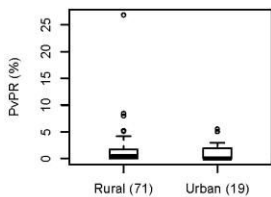**Mahendraa Nagar, Nepal**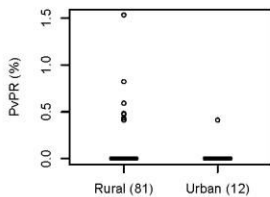**Ndola, Zambia**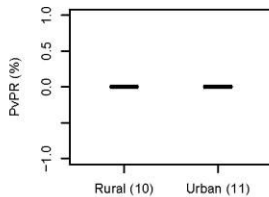**Kitwe, Zambia**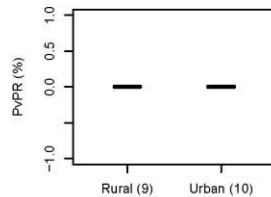**Kupang, Indonesia\*\*\***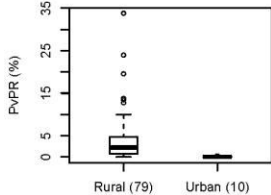**Tapachula, Mexico**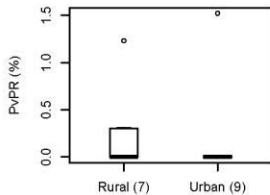**Jalalabad, Afghanistan**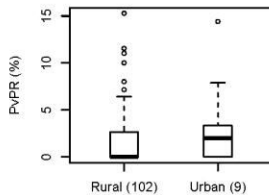**Waja, Ethiopia**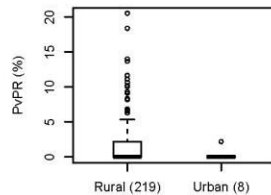**Qandahar, Afghanistan\*\***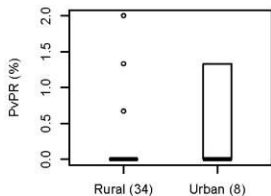**Jambi, Indonesia\***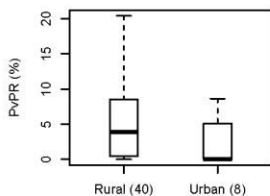**Ambon, Indonesia\*\***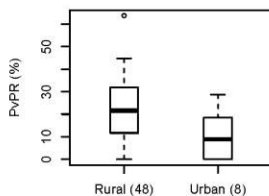**Ariquemes, Brazil\***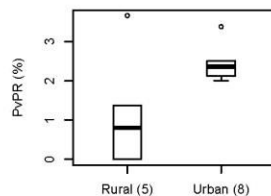

Supplement: MOESM4 [file 9543238]
